# Supplementary material for: A prospective study of 12-week respiratory outcomes in COVID-19-related hospitalisations
Source: HighWire-hosted journal article supplement (doi:10.1136/thoraxjnl-2020-216308), 2020-12-03
Supplement: thoraxjnl-2020-216308supp001_data_supplement.pdf [file thoraxjnl-2020-216308supp001_data_supplement.pdf]

## Supplement

### A prospective study of 12-week respiratory outcomes in COVID-19 related hospitalisations

Aditi S. Shah MD<sup>a</sup>  
Alyson W. Wong MD<sup>a,b</sup>  
Cameron J Hague MD<sup>e</sup>  
Darra T Murphy MD<sup>e</sup>  
James C. Johnston MD<sup>a,c,d</sup>  
Christopher J Ryerson MD<sup>a,b</sup>  
Christopher Carlsten MD<sup>a,c</sup>

<sup>a</sup> Department of Medicine, University of British Columbia, Vancouver, Canada

<sup>b</sup> Centre for Heart Lung Innovation, University of British Columbia, Vancouver, Canada

<sup>c</sup> UBC School of Population and Public Health

<sup>d</sup> BC Centre for Disease Control

<sup>e</sup> Department of Radiology, University of British Columbia, Vancouver, Canada

Figure S1. Study cohort flow diagram

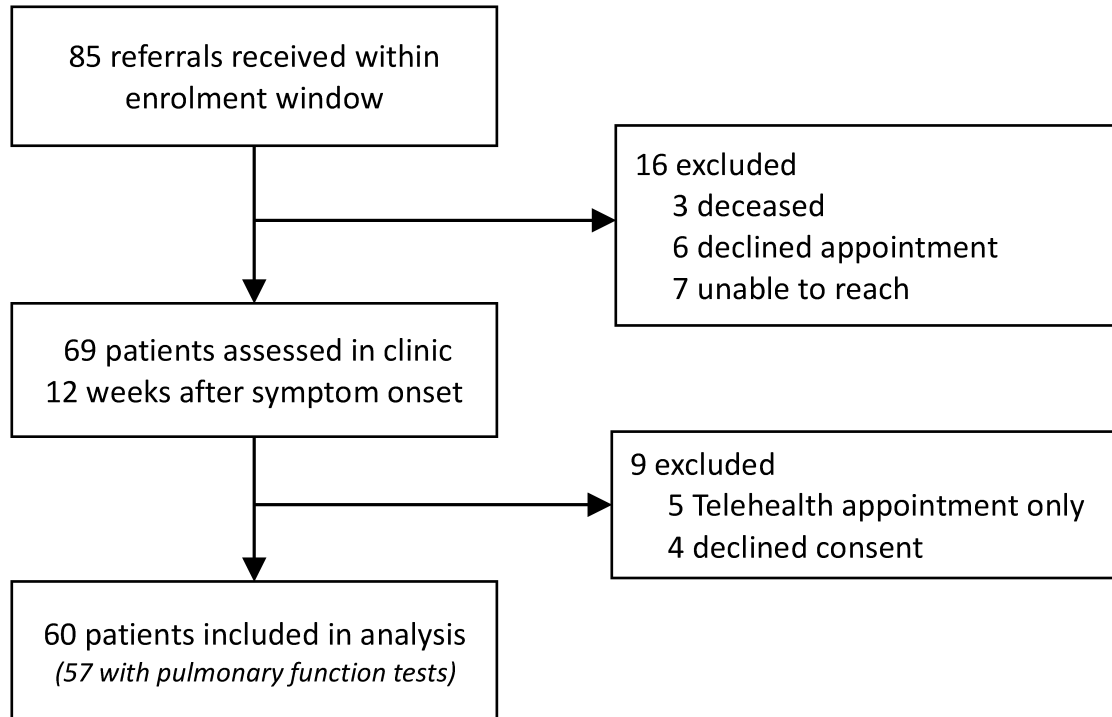

**Table S1:** Baseline characteristics and course in hospital.

| Characteristics                                              | Values       |
|--------------------------------------------------------------|--------------|
| Subjects                                                     | 60           |
| Age, years                                                   | 67 (54 - 74) |
| Male                                                         | 41 (68%)     |
| Body mass index, kg/m <sup>2</sup>                           | 25 (23 - 29) |
| Ever smoker                                                  | 23 (38%)     |
| <b>Respiratory symptoms on presentation</b>                  |              |
| Dyspnea                                                      | 46 (77%)     |
| Cough                                                        | 35 (58%)     |
| <b>Comorbidities</b>                                         |              |
| Hypertension                                                 | 21 (35%)     |
| Diabetes                                                     | 13 (22%)     |
| Chronic pulmonary disease*                                   | 8 (13%)      |
| Coronary heart disease                                       | 6 (10%)      |
| Malignancy                                                   | 6 (10%)      |
| Chronic kidney disease                                       | 4 (7%)       |
| <b>Hospital course</b>                                       |              |
| Hospital length of stay, days                                | 10 (6 - 16)  |
| Patients requiring oxygen supplementation (n=59)             | 46 (78%)     |
| Duration of oxygen supplementation, days <sup>#</sup> (n=56) | 9 (4 - 15)   |
| Need for mechanical ventilation                              | 12 (20%)     |
| Duration of mechanical ventilation, days <sup>#</sup>        | 8 (5 - 11)   |

Data are shown as n (%) or median (IQR).

\*Asthma, chronic obstructive pulmonary disease, interstitial lung disease, or previous pulmonary embolism.

<sup>#</sup>The median duration (IQR) of oxygen supplementation and mechanical ventilation is reported only for those who received this treatment.
